# Supplementary material
Source: publisher site journal article supplement (https://www.dovepress.com/article/599865)
Supplement: Supplementary file 1 [file 599865_supplementary%20tables.docx]

| Table S1 Age-adjusted Charlson Comorbidity Index. | |
| --- | --- |
| Score | Clinical conditions (comorbidities/age) |
| Comorbidity |  |
| 1 Point | Cerebrovascular disease; Chronic pulmonary disease; Connective tissue disease; Congestive heart failure; Dementia; Diabetes; Mild liver disease; Myocardial infarction; Peripheral vascular disease; Peptic ulcer disease |
| 2 Points | Any tumor; Diabetes with endo organ damage; Hemiplegia; Leukemia; Lymphoma; Moderate or severe renal disease |
| 3 Points | Moderate or severe liver disease |
| 6 Points | Acquired immune deficiency syndrome; Metastatic solid tumor |
| Age |  |
| 1 Point | Each decade over 40 years of age (up to a maximum of 4 points) |

| Table S2 Shapiro-Wilk test in this study. | |  |  |
| --- | --- | --- | --- |
| Variable | W statistic | P | Distribution conclusion |
| Age at diagnosis | 0.915 | **0.001** | Non-normal distributed |
| BMI | 0.985 | 0.322 | Normally distributed |
| TC | 0.979 | 0.189 | Normally distributed |
| Albumin | 0.990 | 0.454 | Normally distributed |
| CRP | 0.925 | **0.005** | Non-normal distributed |
| Lymphocyte count | 0.918 | **0.001** | Non-normal distributed |
| Hemoglobin | 0.968 | 0.098 | Normally distributed |
| CALLY index | 0.886 | **<0.001** | Non-normal distributed |
| *Abbreviation* BMI, body mass index; CALLY, CRP-albumin-lymphocyte; CRP, C-reactive protein; TC, total cholesterol.  Bold values indicate statistical significance at p<0.05. | | | |

| Table S3 Assessment of Multicollinearity among Variables in Postoperative HSCC Patients. | | |
| --- | --- | --- |
| Variables | Tolerance | VIF |
| Age at diagnosis | 0.791 | 1.265 |
| Gender | 0.835 | 1.198 |
| ECOG PS score | 0.691 | 1.446 |
| Smoking | 0.862 | 1.159 |
| Grade | 0.825 | 1.212 |
| AJCC stage | 0.281 | 3.564 |
| VI | 0.467 | 2.140 |
| Perineural invasion | 0.687 | 1.456 |
| Surgical safety margin | 0.865 | 1.156 |
| ENE | 0.463 | 2.158 |
| CALLY index | 0.389 | 2.568 |
| ACCI | 0.856 | 1.168 |
| Adjuvant radiotherapy | 0.317 | 3.156 |
| *Abbreviations* ACCI, age-adjusted Charlson comorbidity index; AJCC, American Joint Committee on Cancer; CALLY, CRP-albumin-lymphocyte; ECOG PS, eastern cooperative oncology group performance status; ENE, extranodal extension; HSCC, hypopharyngeal squamous cell carcinoma; VI, vascular invasion. | | |

| Table S4 Missing Data and Handling Methods for Postoperative HSCC Patients. | | | |
| --- | --- | --- | --- |
| Variables | Missing Cases (n) | Missing Proportion (%) | Handling Method |
| Age at diagnosis | 0 | 0 | None |
| Gender | 0 | 0 | None |
| ECOG PS score | 31 | 11.2% | Multiple imputation |
| Smoking | 36 | 9.1% | Multiple imputation |
| Grade | 37 | 13.3% | Multiple imputation |
| AJCC stage | 33 | 11.9% | Multiple imputation |
| VI | 27 | 9.7% | Multiple imputation |
| Perineural invasion | 12 | 4.3% | Complete case deletion |
| Surgical safety margin | 28 | 10.1% | Multiple imputation |
| ENE | 0 | 0 | None |
| CALLY index | 10 | 3.6% | Complete case deletion |
| ACCI | 0 | 0 | None |
| Adjuvant radiotherapy | 0 | 0 | None |
| *Abbreviations* ACCI, age-adjusted Charlson comorbidity index; AJCC, American Joint Committee on Cancer; CALLY, CRP-albumin-lymphocyte; ECOG PS, eastern cooperative oncology group performance status; ENE, extranodal extension; HSCC, hypopharyngeal squamous cell carcinoma; VI, vascular invasion. | | | |

| Table S5 Impact of Adjuvant radiotherapy on DFS and OS in different subgroups. | | | |
| --- | --- | --- | --- |
| Subgroups (Total risk points) | Adjuvant radiotherapy | Chi-Square | P |
| High risk group for DFS  (≥ 170.5) | No (n =35) | 8.77 | **0.003** |
| Yes (n =70) |  |  |
| Medium risk group for DFS  (100.5-165.4) | No (n =35) | 6.02 | **0.014** |
| Yes (n =61) |  |  |
| Low risk group for DFS  (≤ 98.4) | No (n = 28) | 0.03 | 0.860 |
| Yes (n = 49) |  |  |
| High risk group for OS  (≥ 173.5) | No (n = 35) | 6.85 | **0.009** |
| Yes (n = 73) |  |  |
| Medium risk group for OS  (91.2-169.2) | No (n = 36) | 7.72 | **0.005** |
| Yes (n = 59) |  |  |
| Low risk group for OS  (≤ 90.1) | No (n = 27) | 0.28 | 0.590 |
| Yes (n = 48) |  |  |
| *Abbreviation* DFS, disease-free survival; OS, overall survival.  Bold values indicate statistical significance at p<0.05. | | | |
